# Supplementary material
Source: bioRxiv or medRxiv preprint supplement (https://www.biorxiv.org/highwire/filestream/105080/field_highwire_adjunct_files/0/093666-1.pdf)
Supplement: Supplementary file [file 093666-1.pdf]

Supp. Fig. 1: Chromatin accessibility at motifs that are associated with non-TSS PNA

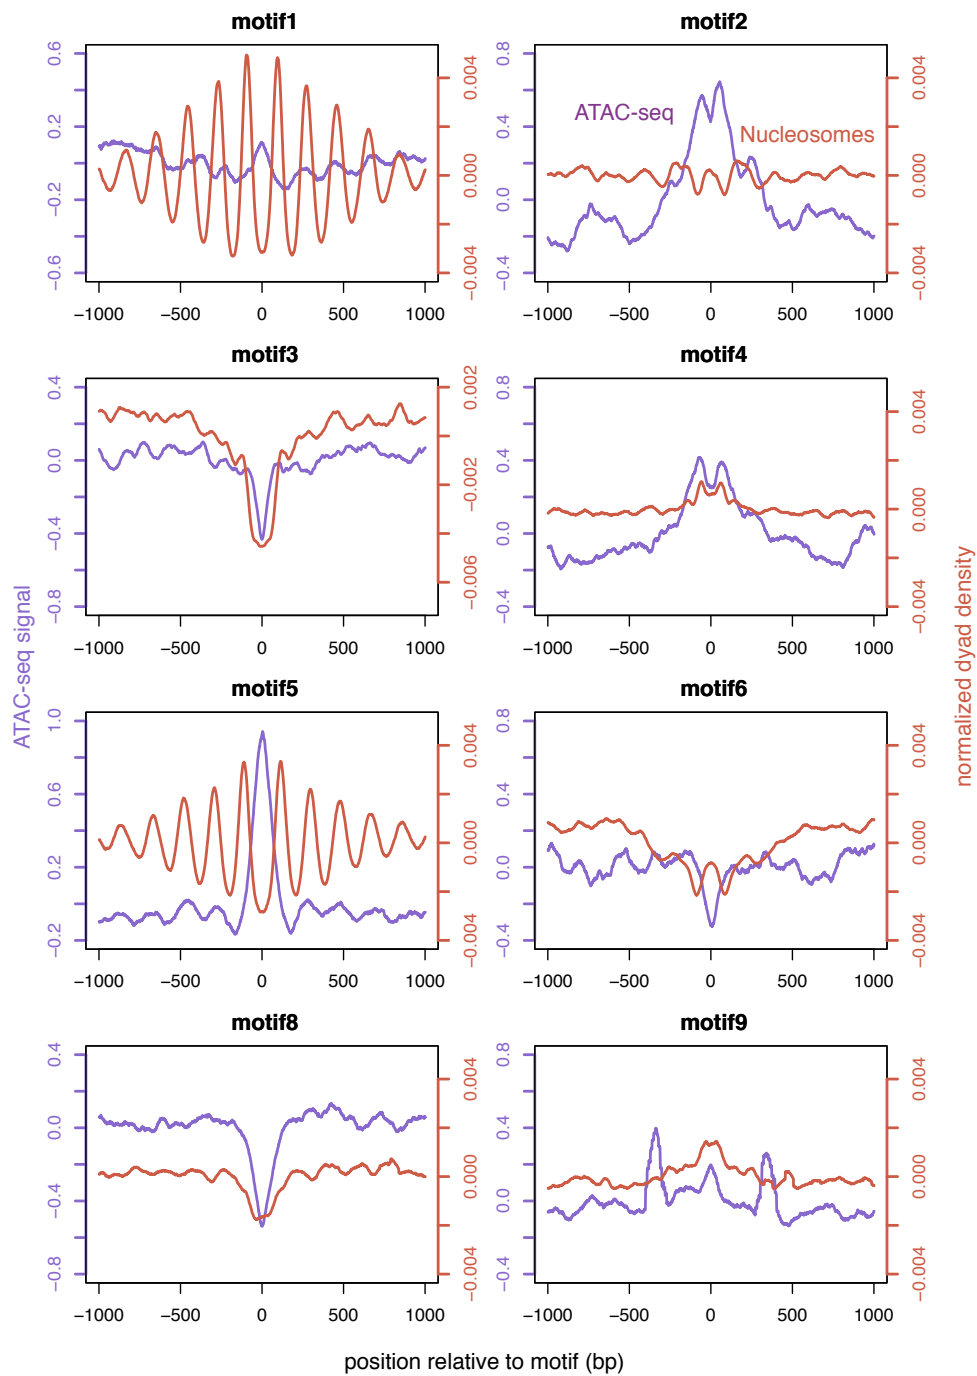

Chromatin accessibility at the DNA motifs identified in Fig. 1A based on ATAC-seq from NC14-18 embryos (Blythe and Wieschaus, 2016) (purple). As a comparison, nucleosome dyad densities from 2-8 h embryos are included (red).



**Supp. Fig. 3 Nucleosomes are still present in the vicinity of ATACG sites in chromatin assembled with *Acf* mutant extract**

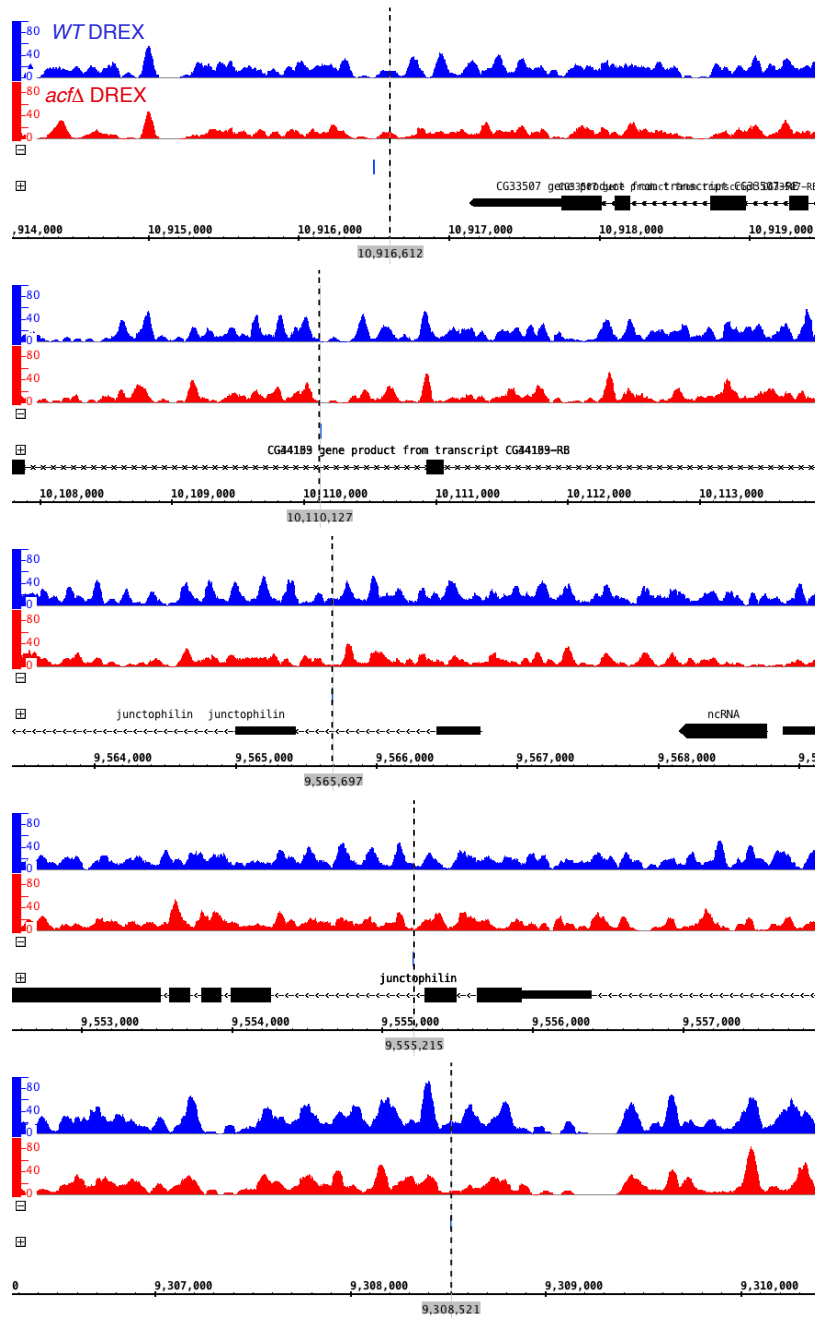

Genome browser screen shots of nucleosome dyad densities around several ATACG sites. Chromatin assembled with *WT* preblastoderm embryo extract in blue, chromatin assembled with *Acf* mutant extract in red. Dashed lines indicate the location of the ATACG motifs.

**Supp. Fig. 4 Recombinant ACF rescues loss of phasing in chromatin assembled with *acf* mutant extract**

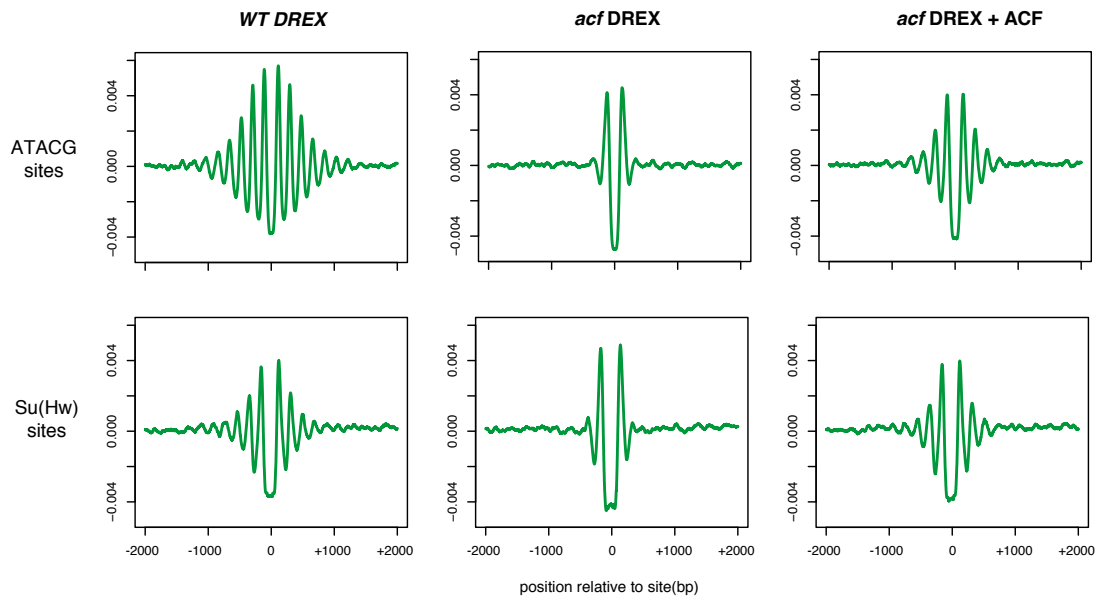

Nucleosome dyad densities aligned at ATACG (top) and su(Hw) sites (bottom) derived from chromatin assembled with *WT* preblastoderm embryo extract, *acf* mutant extract, or *acf* mutant extract supplemented with recombinant ACF.

### Supp. Table S1

| ID        | antigen   | source         | peaks | overlaps/nonTSS-PNA | overlaps/ctrl | log P-Val | log Q-Val | FE  |
|-----------|-----------|----------------|-------|---------------------|---------------|-----------|-----------|-----|
| SRX191909 | su(Hw)    | S2             | 5357  | 861/4867            | 146/4867      | -135,9    | -132,5    | 5,9 |
| SRX101475 | su(Hw)    | Ovary          | 4235  | 814/4867            | 127/4867      | -134,3    | -131,1    | 6,4 |
| SRX191910 | su(Hw)    | S2             | 4958  | 814/4867            | 129/4867      | -133,1    | -130,1    | 6,3 |
| SRX287584 | su(Hw)    | 14-16h embryos | 4941  | 817/4867            | 155/4867      | -119,3    | -116,5    | 5,3 |
| SRX287585 | su(Hw)    | 14-16h embryos | 5310  | 793/4867            | 157/4867      | -112,1    | -109,5    | 5,1 |
| SRX085403 | su(Hw)    | Kc167          | 8598  | 862/4867            | 196/4867      | -110,5    | -107,9    | 4,4 |
| SRX085401 | su(Hw)    | Kc167          | 7779  | 826/4867            | 181/4867      | -108,6    | -106,1    | 4,6 |
| SRX085402 | su(Hw)    | Kc167          | 7845  | 818/4867            | 185/4867      | -104,7    | -102,3    | 4,4 |
| SRX186109 | su(Hw)    | ML-DmBG3-c2    | 3109  | 418/4867            | 65/4867       | -66,4     | -64,0     | 6,4 |
| SRX101478 | su(Hw)    | Ovary          | 2367  | 390/4867            | 64/4867       | -59,8     | -57,5     | 6,1 |
| SRX046654 | su(Hw)    | S2             | 13590 | 834/4867            | 338/4867      | -54,4     | -52,2     | 2,5 |
| SRX046658 | su(Hw)    | S2             | 9550  | 716/4867            | 280/4867      | -48,6     | -46,7     | 2,6 |
| SRX749036 | Cp190     | Kc167          | 13340 | 759/4867            | 309/4867      | -48,6     | -46,7     | 2,5 |
| SRX202127 | su(Hw)    | S3             | 2646  | 325/4867            | 58/4867       | -47,1     | -4,5      | 5,6 |
| SRX749037 | Cp190     | Kc167          | 8882  | 589/4867            | 204/4867      | -47,0     | -45,1     | 2,9 |
| SRX191912 | mod(mdg4) | S2             | 6786  | 475/4867            | 144/4867      | -4,4      | -42,3     | 3,3 |
| SRX191911 | mod(mdg4) | S2             | 6425  | 467/4867            | 147/4867      | -41,5     | -39,7     | 3,2 |
| SRX085400 | Cp190     | Kc167          | 8661  | 431/4867            | 150/4867      | -33,6     | -32,2     | 2,9 |
| SRX191907 | Cp190     | S2             | 12412 | 574/4867            | 254/4867      | -31,0     | -29,7     | 2,3 |
| SRX100248 | Cp190     | Kc167          | 7918  | 452/4867            | 174/4867      | -30,5     | -29,2     | 2,6 |

Top hits of published ChIP profiles resembling the distribution of non-TSS PNAs, sorted by p-value.

**Supp. Table S2: Position Probability Matrices for motifs 1-9**

| #motif1   |           |          |          |
|-----------|-----------|----------|----------|
| 0.698925  | 0.001792  | 0.299283 | 0.000000 |
| 0.139785  | 0.851254  | 0.000000 | 0.008961 |
| 0.032258  | 0.007168  | 0.754480 | 0.206093 |
| 0.001792  | 0.609319  | 0.000000 | 0.388889 |
| 1.000.000 | 0.000000  | 0.000000 | 0.000000 |
| 0.003584  | 0.001792  | 0.001792 | 0.992832 |
| 0.948029  | 0.034050  | 0.014337 | 0.003584 |
| 0.000000  | 1.000.000 | 0.000000 | 0.000000 |
| 0.005376  | 0.000000  | 0.994624 | 0.000000 |
| 0.089606  | 0.856631  | 0.001792 | 0.051971 |
| 0.385305  | 0.605735  | 0.001792 | 0.007168 |
| 0.351254  | 0.252688  | 0.362007 | 0.034050 |
| 0.034050  | 0.553763  | 0.023297 | 0.388889 |
| 0.071685  | 0.012545  | 0.913978 | 0.001792 |
| 0.019713  | 0.023297  | 0.043011 | 0.913978 |
| #motif2   |           |          |          |
| 0.691803  | 0.075410  | 0.216393 | 0.016393 |
| 0.101639  | 0.875410  | 0.000000 | 0.022951 |
| 0.750820  | 0.075410  | 0.088525 | 0.085246 |
| 0.042623  | 0.727869  | 0.072131 | 0.157377 |
| 0.862295  | 0.081967  | 0.029508 | 0.026230 |
| 0.065574  | 0.832787  | 0.059016 | 0.042623 |
| 0.875410  | 0.032787  | 0.032787 | 0.059016 |
| 0.160656  | 0.731148  | 0.049180 | 0.059016 |
| 0.842623  | 0.016393  | 0.098361 | 0.042623 |
| 0.111475  | 0.770492  | 0.055738 | 0.062295 |
| 0.819672  | 0.065574  | 0.032787 | 0.081967 |
| 0.072131  | 0.845902  | 0.022951 | 0.059016 |
| 0.757377  | 0.072131  | 0.137705 | 0.032787 |
| 0.124590  | 0.796721  | 0.013115 | 0.065574 |
| 0.750820  | 0.009836  | 0.127869 | 0.111475 |
| 0.032787  | 0.780328  | 0.147541 | 0.039344 |
| 0.842623  | 0.081967  | 0.075410 | 0.000000 |
| 0.150820  | 0.786885  | 0.013115 | 0.049180 |
| 0.803279  | 0.009836  | 0.091803 | 0.095082 |
| 0.075410  | 0.491803  | 0.183607 | 0.249180 |
| 0.563934  | 0.095082  | 0.186885 | 0.154098 |
| 0.068852  | 0.645902  | 0.108197 | 0.177049 |
| 0.583607  | 0.098361  | 0.213115 | 0.104918 |
| 0.167213  | 0.629508  | 0.114754 | 0.088525 |
| 0.770492  | 0.104918  | 0.045902 | 0.078689 |
| 0.255738  | 0.377049  | 0.091803 | 0.275410 |

|          |          |          |          |
|----------|----------|----------|----------|
| 0.511475 | 0.055738 | 0.236066 | 0.196721 |
|----------|----------|----------|----------|

#motif3

|          |          |          |          |
|----------|----------|----------|----------|
| 0.748459 | 0.106042 | 0.145499 | 0.000000 |
| 0.921085 | 0.016030 | 0.053021 | 0.009864 |
| 0.914920 | 0.082614 | 0.000000 | 0.002466 |
| 0.727497 | 0.091245 | 0.020962 | 0.160296 |
| 0.508015 | 0.125771 | 0.200986 | 0.165228 |
| 0.533909 | 0.138101 | 0.196054 | 0.131936 |
| 0.763255 | 0.155364 | 0.076449 | 0.004932 |
| 0.951911 | 0.003699 | 0.034525 | 0.009864 |
| 0.970407 | 0.029593 | 0.000000 | 0.000000 |
| 0.628853 | 0.128237 | 0.077682 | 0.165228 |
| 0.406905 | 0.251541 | 0.124538 | 0.217016 |
| 0.715166 | 0.064118 | 0.220715 | 0.000000 |
| 0.799014 | 0.093711 | 0.081381 | 0.025894 |
| 0.881628 | 0.099877 | 0.017263 | 0.001233 |
| 0.893958 | 0.007398 | 0.000000 | 0.098644 |

#motif4

|          |          |          |          |
|----------|----------|----------|----------|
| 0.005970 | 0.110448 | 0.847761 | 0.035821 |
| 0.000000 | 0.820896 | 0.000000 | 0.179104 |
| 0.077612 | 0.053731 | 0.098507 | 0.770149 |
| 0.000000 | 0.101493 | 0.844776 | 0.053731 |
| 0.000000 | 0.964179 | 0.032836 | 0.002985 |
| 0.164179 | 0.047761 | 0.080597 | 0.707463 |
| 0.000000 | 0.020896 | 0.979104 | 0.000000 |
| 0.000000 | 0.838806 | 0.000000 | 0.161194 |
| 0.000000 | 0.032836 | 0.032836 | 0.934328 |
| 0.000000 | 0.128358 | 0.871642 | 0.000000 |
| 0.000000 | 0.910448 | 0.038806 | 0.050746 |

#motif5

|          |          |           |          |
|----------|----------|-----------|----------|
| 0.144279 | 0.144279 | 0.318408  | 0.393035 |
| 0.059701 | 0.318408 | 0.000000  | 0.621891 |
| 0.308458 | 0.000000 | 0.651741  | 0.039801 |
| 0.000000 | 0.124378 | 0.009950  | 0.865672 |
| 0.378109 | 0.000000 | 0.024876  | 0.597015 |
| 0.000000 | 0.000000 | 1.000.000 | 0.000000 |
| 0.000000 | 0.955224 | 0.009950  | 0.034826 |
| 0.761194 | 0.223881 | 0.014925  | 0.000000 |
| 0.000000 | 0.074627 | 0.029851  | 0.895522 |
| 0.945274 | 0.000000 | 0.054726  | 0.000000 |
| 0.000000 | 0.975124 | 0.014925  | 0.009950 |
| 0.134328 | 0.059701 | 0.000000  | 0.805970 |
| 0.004975 | 0.024876 | 0.004975  | 0.965174 |

|          |          |          |          |
|----------|----------|----------|----------|
| 0.129353 | 0.154229 | 0.029851 | 0.686567 |
| 0.114428 | 0.218905 | 0.139303 | 0.527363 |
| 0.223881 | 0.283582 | 0.328358 | 0.164179 |
| 0.243781 | 0.059701 | 0.492537 | 0.203980 |
| 0.004975 | 0.014925 | 0.970149 | 0.009950 |
| 0.079602 | 0.547264 | 0.348259 | 0.024876 |
| 0.094527 | 0.039801 | 0.771144 | 0.094527 |
| 0.124378 | 0.582090 | 0.134328 | 0.159204 |

#motif6

|          |          |          |          |
|----------|----------|----------|----------|
| 0.167630 | 0.028902 | 0.716763 | 0.086705 |
| 0.164740 | 0.153179 | 0.468208 | 0.213873 |
| 0.101156 | 0.080925 | 0.497110 | 0.320809 |
| 0.005780 | 0.083815 | 0.910405 | 0.000000 |
| 0.176301 | 0.014451 | 0.728324 | 0.080925 |
| 0.251445 | 0.364162 | 0.210983 | 0.173410 |
| 0.297688 | 0.052023 | 0.569364 | 0.080925 |
| 0.115607 | 0.040462 | 0.708092 | 0.135838 |
| 0.115607 | 0.147399 | 0.297688 | 0.439306 |
| 0.008671 | 0.060694 | 0.927746 | 0.002890 |
| 0.037572 | 0.135838 | 0.716763 | 0.109827 |
| 0.294798 | 0.187861 | 0.323699 | 0.193642 |
| 0.343931 | 0.052023 | 0.511561 | 0.092486 |
| 0.271676 | 0.083815 | 0.644509 | 0.000000 |
| 0.242775 | 0.112717 | 0.283237 | 0.361272 |
| 0.043353 | 0.008671 | 0.684971 | 0.263006 |
| 0.040462 | 0.150289 | 0.705202 | 0.104046 |
| 0.150289 | 0.179191 | 0.453757 | 0.216763 |
| 0.193642 | 0.040462 | 0.508671 | 0.257225 |
| 0.202312 | 0.138728 | 0.520231 | 0.138728 |
| 0.158960 | 0.083815 | 0.471098 | 0.286127 |
| 0.066474 | 0.130058 | 0.693642 | 0.109827 |
| 0.066474 | 0.196532 | 0.549133 | 0.187861 |
| 0.289017 | 0.121387 | 0.335260 | 0.254335 |
| 0.130058 | 0.002890 | 0.757225 | 0.109827 |
| 0.026012 | 0.231214 | 0.630058 | 0.112717 |
| 0.101156 | 0.202312 | 0.306358 | 0.390173 |
| 0.092486 | 0.112717 | 0.708092 | 0.086705 |
| 0.187861 | 0.219653 | 0.537572 | 0.054913 |

#motif7

|          |          |          |          |
|----------|----------|----------|----------|
| 0.074074 | 0.022222 | 0.777778 | 0.125926 |
| 0.000000 | 0.985185 | 0.000000 | 0.014815 |
| 0.007407 | 0.000000 | 0.992593 | 0.000000 |
| 0.014815 | 0.014815 | 0.014815 | 0.955556 |
| 0.977778 | 0.000000 | 0.022222 | 0.000000 |



|          |          |          |           |
|----------|----------|----------|-----------|
| 0.000000 | 0.000000 | 0.000000 | 1.000.000 |
| 0.474074 | 0.000000 | 0.525926 | 0.000000  |
| 0.200000 | 0.711111 | 0.022222 | 0.066667  |
| 0.022222 | 0.000000 | 0.792593 | 0.185185  |
| 0.029630 | 0.237037 | 0.000000 | 0.733333  |
| 0.718519 | 0.044444 | 0.207407 | 0.029630  |
| 0.977778 | 0.000000 | 0.000000 | 0.022222  |
| 0.000000 | 0.074074 | 0.000000 | 0.925926  |
| 0.466667 | 0.022222 | 0.348148 | 0.162963  |
| 0.051852 | 0.162963 | 0.000000 | 0.785185  |

#motif8

|          |          |          |          |
|----------|----------|----------|----------|
| 0.989529 | 0.000000 | 0.000000 | 0.010471 |
| 0.668848 | 0.000000 | 0.000000 | 0.331152 |
| 0.675393 | 0.000000 | 0.000000 | 0.324607 |
| 0.226440 | 0.003927 | 0.000000 | 0.769634 |
| 0.456806 | 0.003927 | 0.301047 | 0.238220 |
| 0.350785 | 0.382199 | 0.000000 | 0.267016 |
| 0.968586 | 0.000000 | 0.000000 | 0.031414 |
| 0.437173 | 0.026178 | 0.000000 | 0.536649 |
| 0.433246 | 0.000000 | 0.061518 | 0.505236 |
| 0.303665 | 0.069372 | 0.044503 | 0.582461 |
| 0.655759 | 0.000000 | 0.017016 | 0.327225 |
| 0.566754 | 0.035340 | 0.000000 | 0.397906 |
| 0.836387 | 0.000000 | 0.000000 | 0.163613 |
| 0.430628 | 0.000000 | 0.000000 | 0.569372 |
| 0.350785 | 0.000000 | 0.036649 | 0.612565 |

#motif9

|           |           |           |          |
|-----------|-----------|-----------|----------|
| 0.000000  | 0.000000  | 1.000.000 | 0.000000 |
| 0.000000  | 0.294118  | 0.705882  | 0.000000 |
| 0.000000  | 0.176471  | 0.000000  | 0.823529 |
| 0.823529  | 0.176471  | 0.000000  | 0.000000 |
| 0.000000  | 1.000.000 | 0.000000  | 0.000000 |
| 0.000000  | 0.529412  | 0.470588  | 0.000000 |
| 0.000000  | 1.000.000 | 0.000000  | 0.000000 |
| 0.000000  | 1.000.000 | 0.000000  | 0.000000 |
| 0.294118  | 0.529412  | 0.000000  | 0.176471 |
| 0.000000  | 0.000000  | 1.000.000 | 0.000000 |
| 0.000000  | 0.823529  | 0.176471  | 0.000000 |
| 0.294118  | 0.705882  | 0.000000  | 0.000000 |
| 0.823529  | 0.000000  | 0.000000  | 0.176471 |
| 0.000000  | 0.176471  | 0.823529  | 0.000000 |
| 0.823529  | 0.000000  | 0.176471  | 0.000000 |
| 1.000.000 | 0.000000  | 0.000000  | 0.000000 |
| 0.000000  | 0.000000  | 1.000.000 | 0.000000 |

|           |           |           |          |
|-----------|-----------|-----------|----------|
| 0.000000  | 0.000000  | 1.000.000 | 0.000000 |
| 0.705882  | 0.294118  | 0.000000  | 0.000000 |
| 0.294118  | 0.705882  | 0.000000  | 0.000000 |
| 0.000000  | 0.000000  | 0.823529  | 0.176471 |
| 0.000000  | 0.294118  | 0.705882  | 0.000000 |
| 1.000.000 | 0.000000  | 0.000000  | 0.000000 |
| 0.882353  | 0.000000  | 0.117647  | 0.000000 |
| 0.000000  | 0.000000  | 0.705882  | 0.294118 |
| 0.000000  | 1.000.000 | 0.000000  | 0.000000 |
| 0.823529  | 0.176471  | 0.000000  | 0.000000 |
| 0.000000  | 1.000.000 | 0.000000  | 0.000000 |
| 0.294118  | 0.705882  | 0.000000  | 0.000000 |
| 0.176471  | 0.000000  | 0.823529  | 0.000000 |

#motif10

|          |          |          |          |
|----------|----------|----------|----------|
| 0.058824 | 0.241830 | 0.666667 | 0.032680 |
| 0.032680 | 0.098039 | 0.000000 | 0.869281 |
| 0.228758 | 0.000000 | 0.771242 | 0.000000 |
| 0.013072 | 0.117647 | 0.065359 | 0.803922 |
| 0.098039 | 0.104575 | 0.725490 | 0.071895 |
| 0.130719 | 0.124183 | 0.013072 | 0.732026 |
| 0.156863 | 0.039216 | 0.803922 | 0.000000 |
| 0.052288 | 0.013072 | 0.006536 | 0.928105 |
| 0.000000 | 0.000000 | 0.993464 | 0.006536 |
| 0.026144 | 0.026144 | 0.006536 | 0.941176 |
| 0.143791 | 0.000000 | 0.823529 | 0.032680 |
| 0.111111 | 0.058824 | 0.000000 | 0.830065 |
| 0.000000 | 0.000000 | 0.934641 | 0.065359 |
| 0.091503 | 0.189542 | 0.032680 | 0.686275 |
| 0.032680 | 0.000000 | 0.830065 | 0.137255 |

**Supp. Table S3: Primers used**

|                                      | Forward primer                               | Reverse primer                                |
|--------------------------------------|----------------------------------------------|-----------------------------------------------|
| CG7372 knockdown, construct 1        | TAATACGACTCACTATAGGGTGGAA<br>GAGGCTGAGGTGG   | TAATACGACTCACTATAGGGTACCGCCGAT<br>CGTTCTTG TG |
| CG7372 knockdown, construct 2        | TAATACGACTCACTATAGGGGCACA<br>CAGGTGAAAAACC   | TAATACGACTCACTATAGGGTGT CATCGAG<br>CTGGACAAAG |
| su(Hw) knockdown, construct 1        | TAATACGACTCACTATAGGGGAGGT<br>TGTACCAGTGGCGTT | TAATACGACTCACTATAGGGCGGCTACCGT<br>AGTCAAGCTC  |
| su(Hw) knockdown, construct 2        | TAATACGACTCACTATAGGGAACTG<br>TGGCCACGACCTAAC | TAATACGACTCACTATAGGGTGTGCGGTAA<br>TTGTACGCAT  |
| Cloned ATACG site 1                  | CATAAATTGCAAGGGAGAACG                        | TGATGTAGTAATTCACAGACC                         |
| Cloned ATACG site 2                  | AAAATGGAGTGGAACGTTGC                         | TTGCGGTTGGCTTGCCTTTTTC                        |
| Cloned ATACG site 3                  | TCGATACGATATTCACAAGG                         | TTTATTCCTCGTCGATTTCC                          |
| Dinucleosomal DNA around ATACG site  | CCATAAAAATAGACAACAAATTGTT                    | CAAGTTATAAATTATTTGGCATTTG                     |
| Dinucleosomal DNA around su(Hw) site | TAGTTTTCCGACTGTGATTGC                        | ATAAGGTATTATTATTTATTTTGGTAC                   |
